# Supplementary material for: Impact of a High-Fat Diet at a Young Age on Wound Healing in Mice
Source: MDPI journal article supplement (doi:10.3390/ijms242417299), 2023-12-09
Supplement: s1 [file s1]

**Supplementary Figure S1**

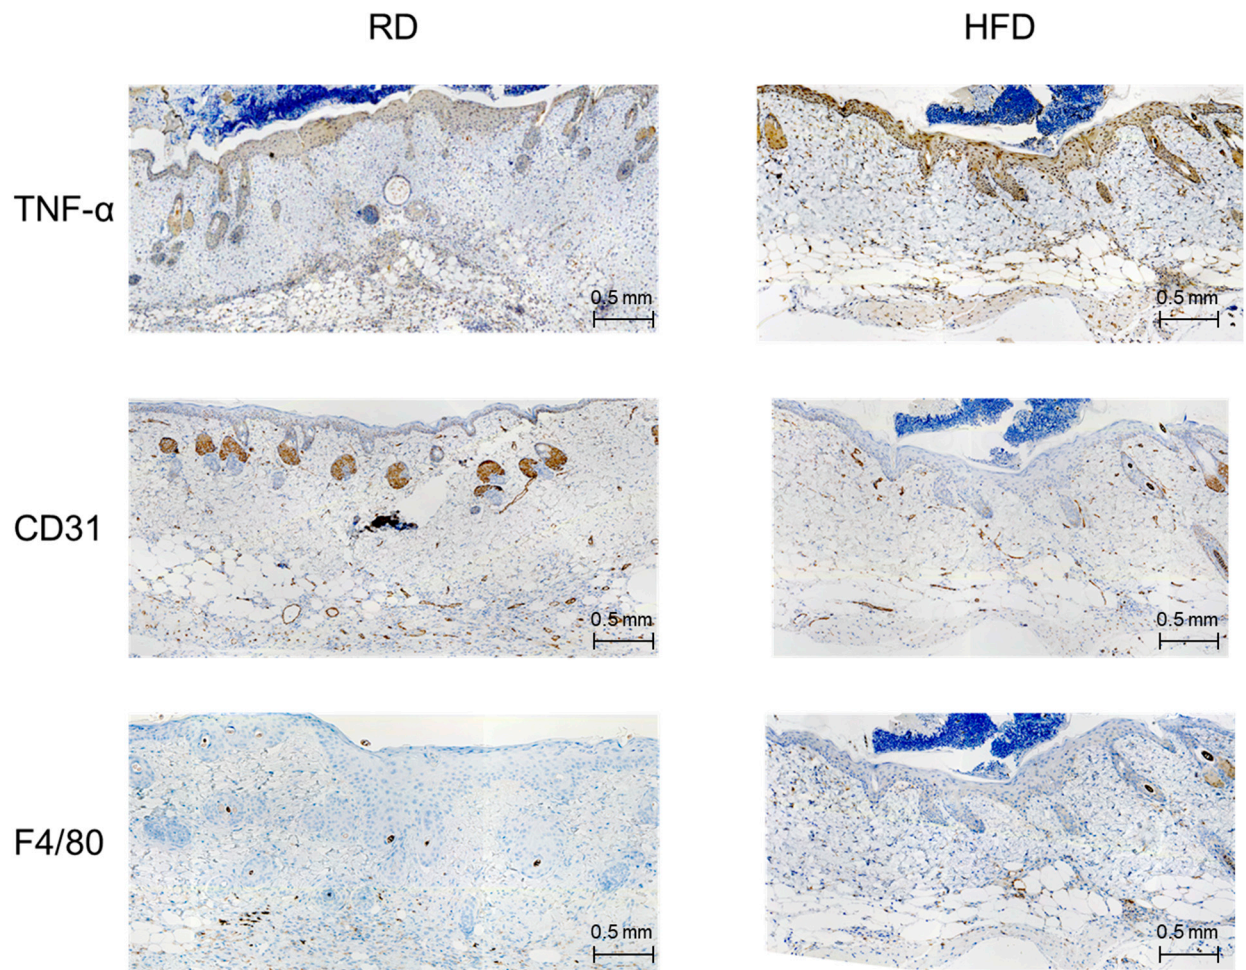

**Supplementary Figure S1:** Representative images of immunohistochemical expression of TNF- $\alpha$ , CD 31 and F4/80 in the high fat diet (HFD) and regular diet (RD) group.
